# Supplementary material for: Synthesis, Structure, and Properties of a Dinuclear Cu(II) Coordination Polymer Based on Quinoxaline and 3,3-Thiodipropionic Acid Ligands
Source: Research Square preprint supplement (doi:10.21203/rs.3.rs-209819/v1), 2021-02-19
Supplement: Supplementary file 1 [file 9ec6defe3c51bd21e6c9e6b0.docx]

**Synthesis, Structure, and Properties of a Dinuclear Cu(II) Coordination Polymer based on Quinoxaline and 3,3-thiodipropionic acid Ligands**

Adedibu C. Tellaa*, Samson O. Owaludea, Vincent O. Adimulaa,b*, Adetola C. Oladipoa, Victoria T. Olayemia, Bushra Ismailb, Amara Mumtazb, Attiq Ur Rehmanb, Asad M. Khanb, Hadley S. Claytonc, Nawaz M. Tahird

*aDepartment of Chemistry, P.M.B.1515, University of Ilorin, Ilorin, Kwara State, Nigeria*

*bDepartment of Chemistry, COMSATS University, Islamabad, Abbottabad Campus, 22060, Pakistan*

*cDepartment of Chemistry, University of South Africa, South Africa*

*dUniversity of Sargodha: Sargodha, Punjab, PK*

*Corresponding author. [ac_tella@yahoo.co.uk](mailto:ac_tella@yahoo.co.uk); [vincentadimula@gmail.com](mailto:vincentadimula@gmail.com)

**[Cu2(TDPH)4(QNX)].DMF 1 Cambridge Crystallography Database Centre (CCDC) Deposition No.: 2015762**

**Volume adsorbed (cm3g-1)**

0.04

0.08

0.12

0.16

0.20

0.24

0.28

0.32


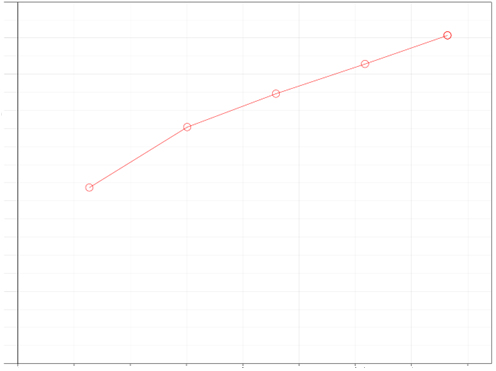


8000

16000

24000

32000

40000

48000

56000

64000

72000

80000

**Relative Pressure (P/Po)**

**Figure S1.** BET Nitrogen isotherm of compound **1**


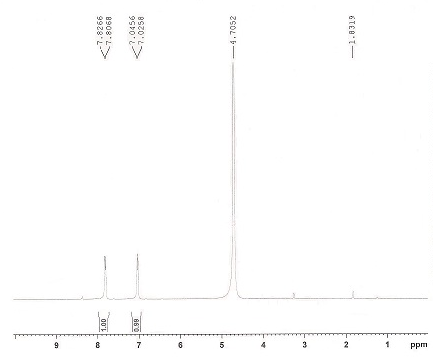


a


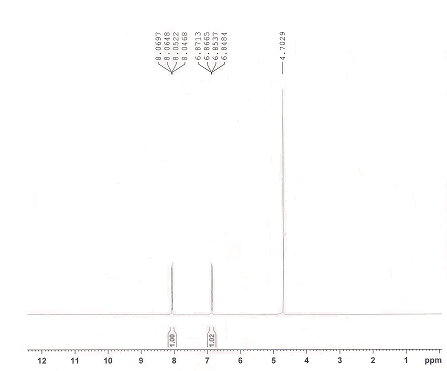


b

**Figure S2.** 1HNMR Spectra of (a) 4-aminophenol; (b) 4-nitrophenol

**Table S1:** Rate constants (kapp) and thermodynamic parameters for the reduction reduction of 4-NP at different temperatures using **1** as catalyst.

| **Parameters** | [Cu2(TDPH)4(QNX)].DMF **1** |
| --- | --- |
| **30 °C** | 8.0 x 10-4 s-1 |
| **40 °C** | 4.0 x 10-4 s-1 |
| **50 °C** | 3.0 x 10-4 s-1 |
| **60 °C** | 8.0 x 10-4 s-1 |
| **Ea (kJ mol-1)** | -3.290 |
| **ΔH (kJ mol-1)** | -5.929 |
| **Δs (J mol-1 K-1)** | 326.872 |
